# Supplementary material for: Nitric Oxide Prevents Fe Deficiency-Induced Photosynthetic Disturbance, and Oxidative Stress in Alfalfa by Regulating Fe Acquisition and Antioxidant Defense
Source: MDPI journal article supplement (doi:10.3390/antiox10101556), 2021-09-29
Supplement: s1 [file s1]

**Supplementary Table S1.** Primers sequences used for qPCR analysis

| Gene name         | Accession no          | Primers | Sequences             |
|-------------------|-----------------------|---------|-----------------------|
| <i>MsActin</i>    | JQ028730.1            | Forward | TTCTCACCACACTTCTCGCC  |
|                   |                       | Reverse | CCAGCCTTCACCATTCCAGT  |
| <i>MsFeSOD</i>    | AF377344.1            | Forward | GAGTACCATTGGGGAAAGCA  |
|                   |                       | Reverse | CCATACCTGTGCTGCATTGT  |
| <i>MsAPX</i>      | EX522382.1            | Forward | GAAATGCGCTCCTCTTATGC  |
|                   |                       | Reverse | TGTTAGCACCATGAGCAAGC  |
| <i>MsMDAR</i>     | EX522162.1            | Forward | TGGTCTACCCAGAACCTTGG  |
|                   |                       | Reverse | CCAGTACCCTTCCGTCCTTT  |
| <i>MsGR</i>       | AM407889.2            | Forward | AGGACGGTGAACCTGATTTG  |
|                   |                       | Reverse | TCTAGCAGCACGAACACCAC  |
| <i>MtIRT1</i>     | KX641478.1            | Forward | TTTACCCTTGGCGACACGTT  |
|                   |                       | Reverse | CATGAACCCGGTCCCAAGAA  |
| <i>MtNramp1</i>   | XM_024781241.1        | Forward | GCATTGCTAGCCTCAGGACA  |
|                   |                       | Reverse | TCCATGCGTATGCAGGTGAT  |
| <i>MtSULTR1;2</i> | <i>Medtr3g073780</i>  | Forward | TATTATCTCCGTGTTGAAGGC |
|                   |                       | Reverse | CAATAAATTTGGCGACCAG   |
| <i>MtCAT</i>      | <i>XM_013606824.1</i> | Forward | CCAAGTCCCACATTCAGGAG  |
|                   |                       | Reverse | ACTGCTTTCCCAGCCTTGTT  |
| <i>MtDHAR</i>     | <i>DQ006811.1</i>     | Forward | GTGTTGCTGACACTGGAGGA  |
|                   |                       | Reverse | CCAGCTGTAGCCTTTTCAGG  |
